# Supplementary material
Source: PubMed Central journal article supplement (PMC2988580)
Supplement: NIHMS166468-supplement-Supplementary_Figure.pdf [file NIHMS166468-supplement-Supplementary_Figure.pdf]

**A Cell lines:**

| Meth (-) controls | Meth (+) controls | MHCII Status | Cell Line | CIITA pIII Me-C site: |   |   |   |   |   |   |   |       | %    | CIITA pIV Me-C site: |   |   |   |   |   |   |   |   |   |    |      | %     |
|-------------------|-------------------|--------------|-----------|-----------------------|---|---|---|---|---|---|---|-------|------|----------------------|---|---|---|---|---|---|---|---|---|----|------|-------|
|                   |                   |              |           | 1                     | 2 | 3 | 4 | 5 | 6 | 7 | 8 | 9     |      | Me:                  | 1 | 2 | 3 | 4 | 5 | 6 | 7 | 8 | 9 | 10 | 11   |       |
|                   |                   | +            | Raji      | □                     | □ | □ | □ | □ | □ | □ | □ | □     | 1.11 | □                    | □ | □ | □ | □ | □ | □ | □ | □ | □ | □  | □    | 0.00  |
|                   |                   | -            | RJ2.2.5   | □                     | □ | □ | □ | □ | □ | □ | □ | □     | 1.11 | □                    | □ | □ | □ | □ | □ | □ | □ | □ | □ | □  | □    | 0.00  |
|                   |                   | -            | Jurkat    | ■                     | ■ | ■ | ■ | ■ | ■ | ■ | ■ | 41.11 | □    | □                    | □ | □ | □ | □ | □ | □ | □ | □ | □ | □  | □    | 22.50 |
|                   |                   | -            | JAR       | ■                     | ■ | ■ | ■ | ■ | ■ | ■ | ■ | 61.11 | ■    | ■                    | ■ | ■ | ■ | ■ | ■ | ■ | ■ | ■ | ■ | ■  | ■    | 55.83 |
|                   |                   | -            | DB        | □                     | □ | □ | □ | □ | □ | □ | □ | 1.11  | □    | □                    | □ | □ | □ | □ | □ | □ | □ | □ | □ | □  | 3.33 |       |
|                   |                   | -            | OCILy10   | □                     | □ | □ | □ | □ | □ | □ | □ | 6.67  | □    | □                    | □ | □ | □ | □ | □ | □ | □ | □ | □ | □  | 0.00 |       |
|                   |                   | +            | SUDHL4    | □                     | □ | □ | □ | □ | □ | □ | □ | 1.11  | □    | □                    | □ | □ | □ | □ | □ | □ | □ | □ | □ | □  | 3.33 |       |
|                   |                   | +            | SUDHL6    | □                     | □ | □ | □ | □ | □ | □ | □ | 7.78  | □    | □                    | □ | □ | □ | □ | □ | □ | □ | □ | □ | □  | 1.67 |       |
|                   |                   | +            | SUDHL10   | □                     | □ | □ | □ | □ | □ | □ | □ | 6.67  | □    | □                    | □ | □ | □ | □ | □ | □ | □ | □ | □ | □  | 2.50 |       |
|                   |                   | +            | OCILy3    | □                     | □ | □ | □ | □ | □ | □ | □ | 6.67  | □    | □                    | □ | □ | □ | □ | □ | □ | □ | □ | □ | □  | 1.67 |       |
|                   |                   | +            | OCILy7    | □                     | □ | □ | □ | □ | □ | □ | □ | 6.67  | □    | □                    | □ | □ | □ | □ | □ | □ | □ | □ | □ | □  | 7.50 |       |
|                   |                   | +            | OCILy19   | □                     | □ | □ | □ | □ | □ | □ | □ | 8.89  | □    | □                    | □ | □ | □ | □ | □ | □ | □ | □ | □ | □  | 4.17 |       |

**B Reactive Tissues:**

| Tissue Type | Case   | CIITA pIII Me-C site: |   |   |   |   |   |   |   |   | %     | CIITA pIV Me-C site: |   |   |   |   |   |   |   |   |   |    |    | % |       |
|-------------|--------|-----------------------|---|---|---|---|---|---|---|---|-------|----------------------|---|---|---|---|---|---|---|---|---|----|----|---|-------|
|             |        | 1                     | 2 | 3 | 4 | 5 | 6 | 7 | 8 | 9 |       | Me:                  | 1 | 2 | 3 | 4 | 5 | 6 | 7 | 8 | 9 | 10 | 11 |   | 12    |
| LN          | LN1    | □                     | □ | □ | □ | □ | □ | □ | □ | □ | 23.33 | □                    | □ | □ | □ | □ | □ | □ | □ | □ | □ | □  | □  | □ | 5.00  |
| LN          | LN2    | □                     | □ | □ | □ | □ | □ | □ | □ | □ | 4.44  | □                    | □ | □ | □ | □ | □ | □ | □ | □ | □ | □  | □  | □ | 0.00  |
| Tonsil      | Tonsil | □                     | □ | □ | □ | □ | □ | □ | □ | □ | 12.22 | □                    | □ | □ | □ | □ | □ | □ | □ | □ | □ | □  | □  | □ | 5.83  |
| LN          | #1028  | □                     | □ | □ | □ | □ | □ | □ | □ | □ | 16.67 | □                    | □ | □ | □ | □ | □ | □ | □ | □ | □ | □  | □  | □ | 10.00 |
| LN          | #1030  | □                     | □ | □ | □ | □ | □ | □ | □ | □ | 11.11 | □                    | □ | □ | □ | □ | □ | □ | □ | □ | □ | □  | □  | □ | 2.50  |
| Tonsil      | #1039  | □                     | □ | □ | □ | □ | □ | □ | □ | □ | 13.33 | □                    | □ | □ | □ | □ | □ | □ | □ | □ | □ | □  | □  | □ | 1.67  |
| LN          | #1043  | □                     | □ | □ | □ | □ | □ | □ | □ | □ | 12.22 | □                    | □ | □ | □ | □ | □ | □ | □ | □ | □ | □  | □  | □ | 5.83  |
| LN          | #1112  | □                     | □ | □ | □ | □ | □ | □ | □ | □ | 16.67 | □                    | □ | □ | □ | □ | □ | □ | □ | □ | □ | □  | □  | □ | 3.33  |
| Tonsil      | #1113  | □                     | □ | □ | □ | □ | □ | □ | □ | □ | 4.44  | □                    | □ | □ | □ | □ | □ | □ | □ | □ | □ | □  | □  | □ | 2.50  |
| LN          | #1114  | □                     | □ | □ | □ | □ | □ | □ | □ | □ | 8.89  | □                    | □ | □ | □ | □ | □ | □ | □ | □ | □ | □  | □  | □ | 5.00  |

Legend % methylation (per 10 clones)  
0 10.....50.....100

**C Cases:**

| DLBCL Subtype | MHC II Status | Case | pIII Me-C site: |   |   |   |   |   |   |   |       | % | pIV Me-C site: |   |   |   |   |   |   |   |   |   |    |    | %     |
|---------------|---------------|------|-----------------|---|---|---|---|---|---|---|-------|---|----------------|---|---|---|---|---|---|---|---|---|----|----|-------|
|               |               |      | 1               | 2 | 3 | 4 | 5 | 6 | 7 | 8 | 9     |   | Me:            | 1 | 2 | 3 | 4 | 5 | 6 | 7 | 8 | 9 | 10 | 11 |       |
| GCB           | -             | #19  | □               | □ | □ | □ | □ | □ | □ | □ | 3.33  | □ | □              | □ | □ | □ | □ | □ | □ | □ | □ | □ | □  | □  | 2.50  |
| GCB           | -             | #65  | □               | □ | □ | □ | □ | □ | □ | □ | 0.00  | □ | □              | □ | □ | □ | □ | □ | □ | □ | □ | □ | □  | □  | 2.50  |
| GCB           | -             | #119 | □               | □ | □ | ■ | □ | □ | □ | □ | 12.22 | ■ | □              | □ | □ | □ | □ | □ | □ | □ | □ | □ | □  | □  | 14.17 |
| GCB           | -             | #132 | □               | □ | □ | □ | □ | □ | □ | □ | 5.56  | □ | □              | □ | □ | □ | □ | □ | □ | □ | □ | □ | □  | □  | 1.67  |
| GCB           | -             | #142 | □               | □ | □ | □ | □ | □ | □ | □ | 5.56  | ■ | □              | □ | □ | □ | □ | □ | □ | □ | □ | □ | □  | □  | 9.17  |
| Uncl          | -             | #15  | □               | □ | □ | □ | □ | □ | □ | □ | 12.22 | □ | □              | □ | □ | □ | □ | □ | □ | □ | □ | □ | □  | □  | 2.50  |
| Uncl          | -             | #101 | □               | □ | □ | □ | □ | □ | □ | □ | 3.33  | □ | □              | □ | □ | □ | □ | □ | □ | □ | □ | □ | □  | □  | 1.67  |
| Uncl          | -             | #122 | □               | □ | □ | □ | □ | □ | □ | □ | 7.78  | □ | □              | □ | □ | □ | □ | □ | □ | □ | □ | □ | □  | □  | 0.83  |
| Uncl          | -             | #285 | □               | □ | □ | □ | □ | □ | □ | □ | 4.44  | □ | □              | □ | □ | □ | □ | □ | □ | □ | □ | □ | □  | □  | 2.50  |
| ABC           | -             | #8   | □               | □ | □ | □ | □ | □ | □ | □ | 8.89  | □ | □              | □ | □ | □ | □ | □ | □ | □ | □ | □ | □  | □  | 2.50  |
| ABC           | -             | #12  | □               | □ | □ | □ | □ | □ | □ | □ | 5.56  | □ | □              | □ | □ | □ | □ | □ | □ | □ | □ | □ | □  | □  | 0.83  |
| ABC           | -             | #58  | □               | □ | □ | □ | □ | □ | □ | □ | 2.22  | ■ | □              | □ | □ | □ | □ | □ | □ | □ | □ | □ | □  | □  | 5.83  |
| ABC           | -             | #64  | □               | □ | □ | □ | □ | □ | □ | □ | 15.56 | □ | □              | □ | □ | □ | □ | □ | □ | □ | □ | □ | □  | □  | 0.00  |
| ABC           | -             | #80  | □               | □ | □ | □ | □ | □ | □ | □ | 18.89 | ■ | □              | □ | □ | □ | □ | □ | □ | □ | □ | □ | □  | □  | 7.50  |
| ABC           | -             | #139 | □               | □ | □ | □ | □ | □ | □ | □ | 5.56  | □ | □              | □ | □ | □ | □ | □ | □ | □ | □ | □ | □  | □  | 3.33  |
| ABC           | -             | #152 | □               | □ | □ | □ | □ | □ | □ | □ | 6.67  | ■ | □              | □ | □ | □ | □ | □ | □ | □ | □ | □ | □  | □  | 10.00 |
| ABC           | -             | #166 | □               | □ | □ | □ | □ | □ | □ | □ | 10.00 | □ | □              | □ | □ | □ | □ | □ | □ | □ | □ | □ | □  | □  | 7.50  |
| ABC           | -             | #203 | □               | □ | □ | □ | □ | □ | □ | □ | 7.78  | ■ | □              | □ | □ | □ | □ | □ | □ | □ | □ | □ | □  | □  | 13.33 |
| ABC           | -             | #272 | □               | □ | □ | □ | □ | □ | □ | □ | 6.67  | □ | □              | □ | □ | □ | □ | □ | □ | □ | □ | □ | □  | □  | 4.17  |
| ABC           | -             | #277 | □               | □ | □ | □ | □ | □ | □ | □ | 3.33  | □ | □              | □ | □ | □ | □ | □ | □ | □ | □ | □ | □  | □  | 9.17  |
| PMBL          | -             | #179 | □               | □ | □ | □ | □ | □ | □ | □ | 7.78  | □ | □              | □ | □ | □ | □ | □ | □ | □ | □ | □ | □  | □  | 1.67  |
| PMBL          | -             | #322 | □               | □ | □ | □ | □ | □ | □ | □ | 3.33  | □ | □              | □ | □ | □ | □ | □ | □ | □ | □ | □ | □  | □  | 0.00  |
| PMBL          | -             | #423 | □               | □ | □ | □ | □ | □ | □ | □ | 10.00 | □ | □              | □ | □ | □ | □ | □ | □ | □ | □ | □ | □  | □  | 0.00  |
| DLBCL         | -             | S6   | □               | □ | □ | □ | □ | □ | □ | □ | 11.11 | □ | □              | □ | □ | □ | □ | □ | □ | □ | □ | □ | □  | □  | 0.00  |
| PTCL          | -             | S7   | □               | □ | □ | ■ | □ | □ | □ | □ | 15.56 | □ | □              | □ | □ | □ | □ | □ | □ | □ | □ | □ | □  | □  | 0.00  |
| PTCL          | -             | S8   | □               | □ | □ | □ | □ | □ | □ | □ | 8.89  | □ | □              | □ | □ | □ | □ | □ | □ | □ | □ | □ | □  | □  | 2.50  |
| TfABC         | -             | #140 | □               | □ | □ | □ | □ | □ | □ | □ | 3.33  | □ | □              | □ | □ | □ | □ | □ | □ | □ | □ | □ | □  | □  | 4.17  |
| TfGCB         | -             | #273 | □               | □ | □ | □ | □ | □ | □ | □ | 6.67  | □ | □              | □ | □ | □ | □ | □ | □ | □ | □ | □ | □  | □  | 18.33 |
| ReABC         | -             | #269 | □               | □ | □ | □ | □ | □ | □ | □ | 0.00  | □ | □              | □ | □ | □ | □ | □ | □ | □ | □ | □ | □  | □  | 0.00  |
| RePMBL        | -             | #67  | □               | □ | □ | □ | □ | □ | □ | □ | 4.44  | □ | □              | □ | □ | □ | □ | □ | □ | □ | □ | □ | □  | □  | 5.83  |
| PMBL          | +             | #25  | □               | □ | □ | □ | □ | □ | □ | □ | 4.44  | ■ | □              | □ | □ | □ | □ | □ | □ | □ | □ | □ | □  | □  | 13.33 |
| PMBL          | +             | #91  | □               | □ | □ | □ | □ | □ | □ | □ | 11.11 | □ | □              | □ | □ | □ | □ | □ | □ | □ | □ | □ | □  | □  | 1.67  |
| PMBL          | +             | #123 | □               | □ | □ | □ | □ | □ | □ | □ | 26.67 | ■ | □              | □ | □ | □ | □ | □ | □ | □ | □ | □ | □  | □  | 15.00 |
| PMBL          | +             | #129 | □               | □ | □ | □ | □ | □ | □ | □ | 5.56  | □ | □              | □ | □ | □ | □ | □ | □ | □ | □ | □ | □  | □  | 4.17  |
| PMBL          | +             | #169 | □               | □ | □ | □ | □ | □ | □ | □ | 20.00 | ■ | □              | □ | □ | □ | □ | □ | □ | □ | □ | □ | □  | □  | 10.83 |
| PMBL          | +             | #172 | □               | □ | □ | □ | □ | □ | □ | □ | 4.44  | ■ | □              | □ | □ | □ | □ | □ | □ | □ | □ | □ | □  | □  | 5.00  |
| PMBL          | +             | #213 | □               | □ | □ | □ | □ | □ | □ | □ | 4.44  | □ | □              | □ | □ | □ | □ | □ | □ | □ | □ | □ | □  | □  | 4.17  |
| PMBL          | +             | #249 | □               | □ | □ | □ | □ | □ | □ | □ | 11.11 | □ | □              | □ | □ | □ | □ | □ | □ | □ | □ | □ | □  | □  | 5.00  |
| PMBL          | +             | #255 | □               | □ | □ | □ | □ | □ | □ | □ | 6.67  | □ | □              | □ | □ | □ | □ | □ | □ | □ | □ | □ | □  | □  | 0.83  |
| PMBL          | +             | #298 | □               | □ | □ | □ | □ | □ | □ | □ | 3.33  | □ | □              | □ | □ | □ | □ | □ | □ | □ | □ | □ | □  | □  | 0.83  |
| PMBL          | +             | #311 | □               | □ | □ | □ | □ | □ | □ | □ | 26.67 | □ | □              | □ | □ | □ | □ | □ | □ | □ | □ | □ | □  | □  | 5.83  |
| PMBL          | +             | #315 | □               | □ | □ | □ | □ | □ | □ | □ | 8.89  | □ | □              | □ | □ | □ | □ | □ | □ | □ | □ | □ | □  | □  | 2.50  |
| PMBL          | +             | #397 | ■               |   |   |   |   |   |   |   |       |   |                |   |   |   |   |   |   |   |   |   |    |    |       |
